# Supplementary material
Source: Research Square preprint supplement (doi:10.21203/rs.3.rs-9070027/v2)
Supplement: Supplementary file 1 [file 5e647a8ad92c5404306b7fe1.docx]

**Generalized** **photoactivatable fluorescent probes enable background-suppressed 3D single-molecule imaging in hydrogels**

Huang Tang,a,b,1 Shuting Liu,a,b,1 Xi Zhang,a,b Xing-Hua Xia,a,b,2 Boyang Huaa,b,2

aSchool of Chemistry, Nanjing University, Nanjing, 210023, China

bState Key Laboratory of Analytical Chemistry for Life Science, Nanjing University, Nanjing, 210023, China

1H.T., and S.L. contributed equally to this work.

2To whom correspondence may be addressed.

**Supplementary Fig. 1** **Characterization of the FQD probes in bulk.** **a**, Native polyacrylamide gel electrophoresis analysis (10%) of FQD2 variants (M denotes the DNA marker). **b-g**, Fluorescence emission spectra before and after different photoactivation time points (0.5 min, 1 min, 2 min, 3 min, 5 min, 10 min, 15 min, 20 min, 30 min, 40 min, 50 min, 70 min, 80 min, and 90 min) for FQD2488 (**b**), FQD1594 (**c**), FQD2594 (**d**), FQD2647 (**e**), PA JF549 (**f**), and PA JF646 (**g**). **h**, Comparative photoactivation efficiencies (left) and on-off intensity ratios (right) of FQD1 and FQD2 versus the commercially available PA JF549 and PA JF646. The UV illumination power density was approximately 0.03 W/cm². All the fluorescence spectra were acquired in Buffer A at a concentration of 200 nM.

**Supplementary Fig. 2** **2D single-molecule imaging of FQD2-biotin immobilized on an imaging surface.** **a**, Workflow of the 2D single-molecule photoactivation experiments. FQD2-biotin is anchored on the surface via the NeutrAvidin and BSA-biotin linkage. **b**, Representative single-molecule images of FQD2 before (BP) and after (AP) photoactivation. The image size was 3.42 × 3.42 mm2. **c,d**,Single-molecule intensity trajectories for FQD2488-biotin (**c**) and FQD2594-biotin (**d**). **e,f**,Quantification of the average spot counts per imaging area before and after photoactivation for FQD2488 (**e**) and FQD2594 (**f**). 3 random imaging regions (3.42 × 3.42 mm2) were analyzed per condition. **g,h**,Percentage of photoactivated FQD2 at different photoactivation time points and at different 405-nm laser powers for FQD2488 (**g**) and FQD2594 (**h**). The percentage of photoactivation at a given time point per laser power condition was calculated as the total spot count (from 3 random imaging regions of 3.42 × 3.42 mm2) normalized to the maximum total spot count of that condition. For the above confocal experiments, a scanning speed of 97.65 ms/pixel and a pixel size of 53.84 × 53.84 nm2 were used. Photoactivation of 1 frame (equivalent to a single-molecule activation time of 4.78 ms per frame) was performed using a 20% 405-nm laser power unless otherwise specified. Error bars, the standard deviation (SD). Scale bars, 0.5 mm. All the single-molecule images were obtained in Buffer B, and 1X Gloxy was added before imaging.

**Supplementary Fig. 3** **2D confocal PhADE imaging.** **a**, Principle of 2D confocal PhADE imaging. FQD2594-biotin is immobilized, while diffusing FQD2594 is introduced in the solution. Upon photoactivation (405 nm), both the immobilized FQD2594-biotin and the diffusing FQD2594 near the focal spot are converted to the “on” state. During excitation (580 nm), the non-immobilized FQD2594 diffuses out of the imaging volume, leading to a time-dependent increase in the SNR of the immobilized FQD2594-biotin. **b**, 2D confocal PhADE imaging of FQD2594-biotin immobilized on an imaging surface with 1 mM diffusing FQD2594 (one PhADE cycle). The image size was 3.42 × 3.42 mm2. **c**, Time-dependent SNR for the immobilized FQD2594-biotin in a single PhADE cycle. "Point A" denotes the specific spot marked in **b**; "Average" represents the mean SNR over all identified spots (n = 7). For the confocal experiments in **a-c**, a scanning speed of 97.65 ms/pixel and a pixel size of 53.84 × 53.84 nm2 were used. Photoactivation of 2 frames (equivalent to a single-molecule activation time of 4.78 ms per frame) was performed using a 20% 405-nm laser power in **a-c**. **d**, Intensity decay curves of background fluorescence in one PhADE cycle at 1 mM FQD2594 under varying glycerol concentrations (0% vs. 25%). The single-exponential decay time constants were 4.4 s and 10.5 s for 0% and 25% glycerol, respectively. For the confocal experiments in **d**, a scanning speed of 97.65 ms/pixel and a pixel size of 53.84 × 53.84 nm2 were used. Photoactivation of 5 frames (equivalent to a single-molecule activation time of 4.78 ms per frame) was performed using a 20% 405-nm laser power in **d**. **e,f**, Fluorescence correlation spectroscopy (FCS) of FQD2594 in 0% glycerol (**e**) and 25% glycerol (**f**). Scale bars, 0.5 mm. All the single-molecule results were obtained in Buffer B with or without 25% glycerol, and 1X Gloxy was added before imaging.

**Supplementary Fig. 4** **3D confocal PhADE imaging of Acrydite-FQD2594 immobilized in a hydrogel matrix with 1 mM diffusing FQD2594 (one PhADE cycle).** The imaging depth was 4 μm, and the image size was 3.42 × 3.42 mm2. Each image represents an average of five raw frames. For the above confocal experiments, a scanning speed of 97.65 ms/pixel and a pixel size of 53.84 × 53.84 nm2 were used. Photoactivation of 2 frames (equivalent to a single-molecule activation time of 4.78 ms per frame) was performed using a 20% 405-nm laser power. Scale bars, 1 mm. All the single-molecule images were obtained in Buffer B, and 1X Gloxy was added before imaging.

**Supplementary Fig. 5** **3D confocal PhADE imaging of individual RCA reactions at 2.5 mM RCA probe-FQD2594 (continuous PhADE cycles).** The imaging depth was 10 μm, and the image size was 13.76 × 13.76 mm2. Each image represents an average of two raw frames. For the above confocal experiments, a scanning speed of 9.75 ms/pixel and a pixel size of 53.84 × 53.84 nm2 were used. Photoactivation of 1 frame (equivalent to a single-molecule activation time of 4.78 ms per frame) was performed using a 20% 405-nm laser power. The duration of diffusion and excitation was 2 frames (approximately 2.6 s). Scale bars, 1 mm. All the single-molecule images were obtained in Buffer D, and 1X Gloxy was added before imaging.

**Supplementary Fig. 6** **3D confocal PhADE imaging of individual RCA reactions.** **a**, Native agarose gel electrophoresis analysis (3%) of RCA reactions with the linear (II) and circular (I) templates (M denotes the DNA marker). **b**, 3D confocal imaging of individual RCA reactions without phi29 DNA Polymerase, with the linear and circular templates at 1X NA-Green. The image size was 13.76 × 13.76 mm2. For the confocal experiments in **b**, a scanning speed of 97.65 ms/pixel and a pixel size of 53.84 × 53.84 nm2 were used. **c**, 3D confocal PhADE imaging of individual RCA reactions after 48 h at 2.5 mM RCA probe-FQD2594 (after photoactivation). The image size was 13.76 × 13.76 mm2. Each image represents an average of two raw frames. **d**, Representative fluorescence intensity trajectories for the growth curves of individual RCA reactions. The addition of phi29 DNA Polymerase and dNTPs was at t = 0 s. Each curve consisted of 25 PhADE cycles. For the confocal experiments in **c,d**, a scanning speed of 9.75 ms/pixel and a pixel size of 53.84 × 53.84 nm2 were used. Photoactivation of 1 frame (equivalent to a single-molecule activation time of 4.78 ms per frame) was performed using a 20% 405-nm laser power in **c,d**. The duration of diffusion and excitation was 2 frames (approximately 2.6 s). **e**, Simulation of the reaction and photoactivation processes with different combinations of phi29 DNA Polymerase speed and photoactivation efficiency. The number of bound probes and the photoactivated portion were simulated. In the simulation, the RCA reactions started at t = 0 s, and the confocal PhADE imaging started at t = 200 s, with 5 s per PhADE cycle. Scale bars, 1 mm. All the single-molecule results were obtained in Buffer D, and 1X Gloxy was added before imaging.

**Supplementary Fig. 7** **3D PA DNA-PAINT imaging.** **a**, Representative intensity trajectories obtained from PA DNA-PAINT experiments at different imager strand concentrations (10 nM, 20 nM, 50 nM, 100 nM, and 200 nM, respectively). **b**, Comparative FWHM values at different imager strand concentrations (20 nM, 50 nM, and 200 nM, respectively). **c**, Representative images of imager strands (100 nM) without (top), with the 8-nt (middle), and the 10-nt (bottom) docking strands. The imaging depth was 4 μm, and the image size was 2.42 × 2.42 mm2. **d,e**, Gillespie simulation of the apparent association rate (1/td) at different imager strand concentrations with different labeling efficiencies, at kon = 0.0034 nM-1 s-1, and koff = 0.06 s-1 (**d**) or 0.75 s-1 (**e**). For the above confocal experiments, a scanning speed of 102.38 ms/pixel and a pixel size of 51.53 × 51.53 nm2 were used. Photoactivation of 1 frame (equivalent to a single-molecule activation time of 5.01 ms per frame) was performed using a 20% 405-nm laser power. The duration of diffusion and excitation was 1 frame (approximately 0.52 s). Scale bars, 0.5 mm. All the single-molecule results were obtained in Buffer C, and 1X Gloxy was added before imaging.
